# Supplementary material
Source: publisher figshare collection journal article supplement (https://tandf.figshare.com/articles/dataset/_/2082700)
Supplement: Supplementary file 1 [file 2]

# Supplemental Materials for “A concave pairwise fusion approach to subgroup analysis”

Shujie Ma\*

Department of Statistics, University of California at Riverside  
and

Jian Huang†

Department of Statistics and Actuarial Science, University of Iowa

In this supplement, we give the technical proofs for Proposition 1 and Theorems 1-3. We also provide a detailed estimation procedure for model (2) based on the ADMM algorithm in a way similar to that for model (1).

## A.1 Proof of Proposition 1

In this section we show the results in Proposition 1. By the definition of  $\boldsymbol{\eta}^{(m+1)}$ , we have

$$L(\boldsymbol{\mu}^{(m+1)}, \boldsymbol{\beta}^{(m+1)}, \boldsymbol{\eta}^{(m+1)}, \boldsymbol{v}^{(m)}) \leq L(\boldsymbol{\mu}^{(m+1)}, \boldsymbol{\beta}^{(m+1)}, \boldsymbol{\eta}, \boldsymbol{v}^{(m)})$$

for any  $\boldsymbol{\eta}$ . Define

$$\begin{aligned} f^{(m+1)} &= \inf_{\boldsymbol{\Delta}\boldsymbol{\mu}^{(m+1)} - \boldsymbol{\eta} = \mathbf{0}} \left\{ \frac{1}{2} \left\| \boldsymbol{y} - \boldsymbol{\mu}^{(m+1)} - \boldsymbol{X}\boldsymbol{\beta}^{(m+1)} \right\|^2 + \sum_{i < j} p_{\gamma}(|\eta_{ij}|, \lambda) \right\} \\ &= \inf_{\boldsymbol{\Delta}\boldsymbol{\mu}^{(m+1)} - \boldsymbol{\eta} = \mathbf{0}} L(\boldsymbol{\mu}^{(m+1)}, \boldsymbol{\beta}^{(m+1)}, \boldsymbol{\eta}, \boldsymbol{v}^{(m)}). \end{aligned}$$

Then

$$L(\boldsymbol{\mu}^{(m+1)}, \boldsymbol{\beta}^{(m+1)}, \boldsymbol{\eta}^{(m+1)}, \boldsymbol{v}^{(m)}) \leq f^{(m+1)}.$$

---

\*The research of Ma is supported in part by the U.S. NSF grant DMS-13-06972.

†Corresponding author. The research of Huang is supported in part by the U.S. NSF grant DMS-12-08225.

Let  $t$  be an integer. Since  $\mathbf{v}^{(m+t-1)} = \mathbf{v}^{(m)} + \vartheta \sum_{i=1}^{t-1} (\Delta \boldsymbol{\mu}^{(m+i)} - \boldsymbol{\eta}^{(m+i)})$ , we have

$$\begin{aligned}
& L(\boldsymbol{\mu}^{(m+t)}, \boldsymbol{\beta}^{(m+t)}, \boldsymbol{\eta}^{(m+t)}, \mathbf{v}^{(m+t-1)}) \\
&= \frac{1}{2} \left\| \mathbf{y} - \boldsymbol{\mu}^{(m+t)} - \mathbf{X} \boldsymbol{\beta}^{(m+t)} \right\|^2 + \mathbf{v}^{(m+t-1)\text{T}} (\Delta \boldsymbol{\mu}^{(m+t)} - \boldsymbol{\eta}^{(m+t)}) \\
&\quad + \frac{\vartheta}{2} \left\| \Delta \boldsymbol{\mu}^{(m+t)} - \boldsymbol{\eta}^{(m+t)} \right\|^2 + \sum_{i < j} p_{\gamma}(|\eta_{ij}^{(m+t)}|, \lambda) \\
&= \frac{1}{2} \left\| \mathbf{y} - \boldsymbol{\mu}^{(m+t)} - \mathbf{X} \boldsymbol{\beta}^{(m+t)} \right\|^2 + \mathbf{v}^{(m)\text{T}} (\Delta \boldsymbol{\mu}^{(m+t)} - \boldsymbol{\eta}^{(m+t)}) \\
&\quad + \vartheta \sum_{i=1}^{t-1} (\Delta \boldsymbol{\mu}^{(m+i)} - \boldsymbol{\eta}^{(m+i)})^{\text{T}} (\Delta \boldsymbol{\mu}^{(m+t)} - \boldsymbol{\eta}^{(m+t)}) \\
&\quad + \frac{\vartheta}{2} \left\| \Delta \boldsymbol{\mu}^{(m+t)} - \boldsymbol{\eta}^{(m+t)} \right\|^2 + \sum_{i < j} p_{\gamma}(|\eta_{ij}^{(m+t)}|, \lambda) \\
&\leq f^{(m+t)}.
\end{aligned}$$

Since the objective function  $L(\boldsymbol{\mu}, \boldsymbol{\beta}, \boldsymbol{\eta}, \mathbf{v})$  is differentiable with respect to  $(\boldsymbol{\mu}, \boldsymbol{\beta})$  and is convex with respect to  $\boldsymbol{\eta}$ , by applying the results in Theorem 4.1 of Tseng (1991), the sequence  $(\boldsymbol{\mu}^{(m)}, \boldsymbol{\beta}^{(m)}, \boldsymbol{\eta}^{(m)})$  has a limit point, denoted by  $(\boldsymbol{\mu}^*, \boldsymbol{\beta}^*, \boldsymbol{\eta}^*)$ . Then we have

$$f^* = \lim_{m \rightarrow \infty} f^{(m+1)} = \lim_{m \rightarrow \infty} f^{(m+t)} = \inf_{\Delta \boldsymbol{\mu}^* - \boldsymbol{\eta} = \mathbf{0}} \left\{ \frac{1}{2} \left\| \mathbf{y} - \boldsymbol{\mu}^* - \mathbf{X} \boldsymbol{\beta}^* \right\|^2 + \sum_{i < j} p_{\gamma}(|\eta_{ij}|, \lambda) \right\},$$

and for all  $t \geq 0$

$$\begin{aligned}
& \lim_{m \rightarrow \infty} L(\boldsymbol{\mu}^{(m+t)}, \boldsymbol{\beta}^{(m+t)}, \boldsymbol{\eta}^{(m+t)}, \mathbf{v}^{(m+t-1)}) \\
&= \frac{1}{2} \left\| \mathbf{y} - \boldsymbol{\mu}^* - \mathbf{X} \boldsymbol{\beta}^* \right\|^2 + \sum_{i < j} p_{\gamma}(|\eta_{ij}^*|, \lambda) + \lim_{m \rightarrow \infty} \mathbf{v}^{(m)\text{T}} (\Delta \boldsymbol{\mu}^* - \boldsymbol{\eta}^*) + (t - \frac{1}{2}) \vartheta \left\| \Delta \boldsymbol{\mu}^* - \boldsymbol{\eta}^* \right\|^2 \\
&\leq f^*.
\end{aligned}$$

Hence  $\lim_{m \rightarrow \infty} \|\mathbf{r}^{(m)}\|^2 = r^* = \|\Delta \boldsymbol{\mu}^* - \boldsymbol{\eta}^*\|^2 = 0$ .

Since  $(\boldsymbol{\mu}^{(m+1)}, \boldsymbol{\beta}^{(m+1)})$  minimize  $L(\boldsymbol{\mu}, \boldsymbol{\beta}, \boldsymbol{\eta}^{(m)}, \mathbf{v}^{(m)})$  by definition, we have that

$$\partial L(\boldsymbol{\mu}^{(m+1)}, \boldsymbol{\beta}^{(m+1)}, \boldsymbol{\eta}^{(m)}, \mathbf{v}^{(m)}) / \partial \boldsymbol{\mu} = \mathbf{0},$$

and moreover,

$$\begin{aligned}
& \partial L(\boldsymbol{\mu}^{(m+1)}, \boldsymbol{\beta}^{(m+1)}, \boldsymbol{\eta}^{(m)}, \mathbf{v}^{(m)}) / \partial \boldsymbol{\mu} \\
&= \boldsymbol{\mu}^{(m+1)} + \mathbf{X} \boldsymbol{\beta}^{(m+1)} - \mathbf{y} + \Delta^{\text{T}} \mathbf{v}^{(m)} + \Delta^{\text{T}} \vartheta (\Delta \boldsymbol{\mu}^{(m+1)} - \boldsymbol{\eta}^{(m)}) \\
&= \boldsymbol{\mu}^{(m+1)} + \mathbf{X} \boldsymbol{\beta}^{(m+1)} - \mathbf{y} + \Delta^{\text{T}} (\mathbf{v}^{(m)} + \vartheta (\Delta \boldsymbol{\mu}^{(m+1)} - \boldsymbol{\eta}^{(m)})) \\
&= \boldsymbol{\mu}^{(m+1)} + \mathbf{X} \boldsymbol{\beta}^{(m+1)} - \mathbf{y} + \Delta^{\text{T}} \mathbf{v}^{(m+1)} + \vartheta \Delta^{\text{T}} (\boldsymbol{\eta}^{(m+1)} - \boldsymbol{\eta}^{(m)}).
\end{aligned}$$

The last step follows from  $\mathbf{v}^{(m+1)} = \mathbf{v}^{(m)} + \vartheta(\Delta\boldsymbol{\mu}^{(m+1)} - \boldsymbol{\eta}^{(m+1)})$ . Therefore,

$$\mathbf{s}^{(m+1)} = \vartheta \Delta^T (\boldsymbol{\eta}^{(m+1)} - \boldsymbol{\eta}^{(m)}) = -(\boldsymbol{\mu}^{(m+1)} + \mathbf{X}\boldsymbol{\beta}^{(m+1)} - \mathbf{y} + \Delta^T \mathbf{v}^{(m+1)}).$$

Since  $\|\Delta\boldsymbol{\mu}^* - \boldsymbol{\eta}^*\|^2 = 0$ ,

$$\begin{aligned} & \lim_{m \rightarrow \infty} \partial L(\boldsymbol{\mu}^{(m+1)}, \boldsymbol{\beta}^{(m+1)}, \boldsymbol{\eta}^{(m)}, \mathbf{v}^{(m)}) / \partial \boldsymbol{\mu} \\ &= \lim_{m \rightarrow \infty} \boldsymbol{\mu}^{(m+1)} + \mathbf{X}\boldsymbol{\beta}^{(m+1)} - \mathbf{y} + \Delta^T \mathbf{v}^{(m+1)} \\ &= \boldsymbol{\mu}^* + \mathbf{X}\boldsymbol{\beta}^* - \mathbf{y} + \Delta^T \mathbf{v}^* = \mathbf{0}. \end{aligned}$$

Therefore,  $\lim_{m \rightarrow \infty} \mathbf{s}^{(m+1)} = \mathbf{0}$ .

## A.2 Proof of Theorem 1

In this section we show the results in Theorem 1. Since for every  $\boldsymbol{\mu} \in \mathcal{M}_{\mathcal{G}}$ , it can be written as  $\boldsymbol{\mu} = \mathbf{Z}\boldsymbol{\alpha}$ , and hence  $\boldsymbol{\alpha} = \mathbf{D}^{-1}\mathbf{Z}^T\boldsymbol{\mu}$ . Then  $((\hat{\boldsymbol{\mu}}^{or})^T, (\hat{\boldsymbol{\beta}}^{or})^T)^T = ((\mathbf{Z}\hat{\boldsymbol{\alpha}}^{or})^T, (\hat{\boldsymbol{\beta}}^{or})^T)^T$ , where

$$\begin{pmatrix} \hat{\boldsymbol{\alpha}}^{or} \\ \hat{\boldsymbol{\beta}}^{or} \end{pmatrix} = \arg \min_{\boldsymbol{\alpha} \in R^K, \boldsymbol{\beta} \in R^p} \frac{1}{2} \|\mathbf{y} - \mathbf{Z}\boldsymbol{\alpha} - \mathbf{X}\boldsymbol{\beta}\|^2 = [(\mathbf{Z}, \mathbf{X})^T (\mathbf{Z}, \mathbf{X})]^{-1} (\mathbf{Z}, \mathbf{X})^T \mathbf{y}.$$

Then

$$\begin{pmatrix} \hat{\boldsymbol{\alpha}}^{or} - \boldsymbol{\alpha}^0 \\ \hat{\boldsymbol{\beta}}^{or} - \boldsymbol{\beta}^0 \end{pmatrix} = [(\mathbf{Z}, \mathbf{X})^T (\mathbf{Z}, \mathbf{X})]^{-1} (\mathbf{Z}, \mathbf{X})^T \boldsymbol{\epsilon},$$

where  $\boldsymbol{\epsilon} = (\epsilon_1, \dots, \epsilon_n)^T$  and  $\boldsymbol{\alpha}^0 = (\alpha_1^0, \dots, \alpha_K^0)^T$ . Hence

$$\left\| \begin{pmatrix} \hat{\boldsymbol{\alpha}}^{or} - \boldsymbol{\alpha}^0 \\ \hat{\boldsymbol{\beta}}^{or} - \boldsymbol{\beta}^0 \end{pmatrix} \right\|_{\infty} \leq \left\| [(\mathbf{Z}, \mathbf{X})^T (\mathbf{Z}, \mathbf{X})]^{-1} \right\|_{\infty} \left\| (\mathbf{Z}, \mathbf{X})^T \boldsymbol{\epsilon} \right\|_{\infty}. \quad (\text{A.1})$$

By Condition (C1), we have  $\left\| [(\mathbf{Z}, \mathbf{X})^T (\mathbf{Z}, \mathbf{X})]^{-1} \right\| \leq C_1^{-1} |\mathcal{G}_{\min}|^{-1}$  and thus

$$\left\| [(\mathbf{Z}, \mathbf{X})^T (\mathbf{Z}, \mathbf{X})]^{-1} \right\|_{\infty} \leq \sqrt{K + p} C_1^{-1} |\mathcal{G}_{\min}|^{-1}. \quad (\text{A.2})$$

Moreover

$$P(\left\| (\mathbf{Z}, \mathbf{X})^T \boldsymbol{\epsilon} \right\|_{\infty} > C\sqrt{n \log n}) \leq P(\left\| \mathbf{Z}^T \boldsymbol{\epsilon} \right\|_{\infty} > C\sqrt{n \log n}) + P(\left\| \mathbf{X}^T \boldsymbol{\epsilon} \right\|_{\infty} > C\sqrt{n \log n}),$$

for some constant  $0 < C < \infty$ . By Condition (C3) and union bound,

$$\begin{aligned} & P\left(\left\| \mathbf{Z}^T \boldsymbol{\epsilon} \right\|_{\infty} > C\sqrt{n \log n}\right) \\ & \leq \sum_{k=1}^K P(|\sum_{i \in \mathcal{G}_k} \epsilon_i| > C\sqrt{n \log n}) \leq \sum_{k=1}^K P(|\sum_{i \in \mathcal{G}_k} \epsilon_i| > \sqrt{|\mathcal{G}_k|} C\sqrt{\log n}) \\ & \leq 2K \exp(-c_1 C^2 \log n) = 2K n^{-c_1 C^2}, \end{aligned}$$

and by Conditions (C1) and (C3) and union bound,

$$\begin{aligned}
& P\left(\|\mathbf{X}^T \boldsymbol{\epsilon}\|_\infty > C\sqrt{n \log n}\right) \\
& \leq \sum_{j=1}^p P\left(|\mathbf{X}_j^T \boldsymbol{\epsilon}| > \sqrt{n} C \sqrt{\log n}\right) \\
& \leq 2p \exp(-c_1 C^2 \log n) = 2pn^{-c_1 C^2}.
\end{aligned}$$

By the above results, we have

$$P\left(\|(\mathbf{Z}, \mathbf{X})^T \boldsymbol{\epsilon}\|_\infty > C\sqrt{n \log n}\right) \leq 2(K+p)n^{-c_1 C^2}. \quad (\text{A.3})$$

Therefore, by (A.1), (A.2) and (A.3), we have with probability at least  $1 - 2(K+p)n^{-c_1 C^2}$ ,

$$\left\| \begin{pmatrix} \hat{\boldsymbol{\alpha}}^{or} - \boldsymbol{\alpha}^0 \\ \hat{\boldsymbol{\beta}}^{or} - \boldsymbol{\beta}^0 \end{pmatrix} \right\|_\infty \leq CC_1^{-1} \sqrt{K+p} |\mathcal{G}_{\min}|^{-1} \sqrt{n \log n},$$

and hence  $\|\hat{\boldsymbol{\mu}}^{or} - \boldsymbol{\mu}^0\|_\infty = \|\hat{\boldsymbol{\alpha}}^{or} - \boldsymbol{\alpha}^0\|_\infty \leq CC_1^{-1} \sqrt{K+p} |\mathcal{G}_{\min}|^{-1} \sqrt{n \log n}$ . The result (8) in Theorem 1 is proved by letting  $C = c_1^{-1/2}$ , and result (10) follows from Central Limit Theorem.

### A.3 Proof of Theorem 2

In this section we show the results in Theorem 2. Define

$$\begin{aligned}
L_n(\boldsymbol{\mu}, \boldsymbol{\beta}) &= \frac{1}{2} \|\mathbf{y} - \boldsymbol{\mu} - \mathbf{X}\boldsymbol{\beta}\|^2, P_n(\boldsymbol{\mu}) = \lambda \sum_{i < j} \rho(|\mu_i - \mu_j|), \\
L_n^{\mathcal{G}}(\boldsymbol{\alpha}, \boldsymbol{\beta}) &= \frac{1}{2} \|\mathbf{y} - \mathbf{Z}\boldsymbol{\alpha} - \mathbf{X}\boldsymbol{\beta}\|^2, P_n^{\mathcal{G}}(\boldsymbol{\alpha}) = \lambda \sum_{k < k'} |\mathcal{G}_k| |\mathcal{G}_{k'}| \rho(|\alpha_k - \alpha_{k'}|),
\end{aligned}$$

and let

$$Q_n(\boldsymbol{\mu}, \boldsymbol{\beta}) = L_n(\boldsymbol{\mu}, \boldsymbol{\beta}) + P_n(\boldsymbol{\mu}), Q_n^{\mathcal{G}}(\boldsymbol{\alpha}, \boldsymbol{\beta}) = L_n^{\mathcal{G}}(\boldsymbol{\alpha}, \boldsymbol{\beta}) + P_n^{\mathcal{G}}(\boldsymbol{\alpha}).$$

Let  $T : \mathcal{M}_{\mathcal{G}} \rightarrow R^K$  be the mapping such that  $T(\boldsymbol{\mu})$  is the  $K \times 1$  vector whose  $k^{\text{th}}$  coordinate equals to the common value of  $\mu_i$  for  $i \in \mathcal{G}_k$ . Let  $T^* : R^n \rightarrow R^K$  be the mapping such that  $T^*(\boldsymbol{\mu}) = \{|\mathcal{G}_k|^{-1} \sum_{i \in \mathcal{G}_k} \mu_i\}_{k=1}^K$ . Clearly, when  $\boldsymbol{\mu} \in \mathcal{M}_{\mathcal{G}}$ ,  $T(\boldsymbol{\mu}) = T^*(\boldsymbol{\mu})$ .

By calculation, for every  $\boldsymbol{\mu} \in \mathcal{M}_{\mathcal{G}}$ , we have  $P_n(\boldsymbol{\mu}) = P_n^{\mathcal{G}}(T(\boldsymbol{\mu}))$  and for every  $\boldsymbol{\alpha} \in R^K$ , we have  $P_n(T^{-1}(\boldsymbol{\alpha})) = P_n^{\mathcal{G}}(\boldsymbol{\alpha})$ . Hence

$$Q_n(\boldsymbol{\mu}, \boldsymbol{\beta}) = Q_n^{\mathcal{G}}(T(\boldsymbol{\mu}), \boldsymbol{\beta}), Q_n^{\mathcal{G}}(\boldsymbol{\alpha}, \boldsymbol{\beta}) = Q_n(T^{-1}(\boldsymbol{\alpha}), \boldsymbol{\beta}). \quad (\text{A.4})$$

Consider the neighborhood of  $(\boldsymbol{\mu}^0, \boldsymbol{\beta}^0)$ :

$$\Theta = \{\boldsymbol{\mu} \in R^n, \boldsymbol{\beta} \in R^p : \|((\boldsymbol{\mu} - \boldsymbol{\mu}^0)^T, (\boldsymbol{\beta} - \boldsymbol{\beta}^0)^T)^T\|_\infty \leq \phi_n\}.$$

By the result in Theorem 1, there is an event  $E_1$  such that on the event  $E_1$ ,

$$\left\| ((\hat{\boldsymbol{\mu}}^{or} - \boldsymbol{\mu}^0)^T, (\hat{\boldsymbol{\beta}}^{or} - \boldsymbol{\beta}^0)^T)^T \right\|_{\infty} \leq \phi_n,$$

and  $P(E_1^C) \leq 2(K+p)n^{-1}$ . Hence  $((\hat{\boldsymbol{\mu}}^{or})^T, (\hat{\boldsymbol{\beta}}^{or})^T)^T \in \Theta$  on the event  $E_1$ . For any  $\boldsymbol{\mu} \in R^n$ , let  $\boldsymbol{\mu}^* = T^{-1}(T^*(\boldsymbol{\mu}))$ . We show that  $(\hat{\boldsymbol{\mu}}^{or}, \hat{\boldsymbol{\beta}}^{or})$  is a strictly local minimizer of the objective function (3) with probability approaching 1 through the following two steps.

(i). On the event  $E_1$ ,  $Q_n(\boldsymbol{\mu}^*, \boldsymbol{\beta}) > Q_n(\hat{\boldsymbol{\mu}}^{or}, \hat{\boldsymbol{\beta}}^{or})$  for any  $((\boldsymbol{\mu})^T, (\boldsymbol{\beta})^T)^T \in \Theta$  and  $((\boldsymbol{\mu}^*)^T, (\boldsymbol{\beta})^T)^T \neq ((\hat{\boldsymbol{\mu}}^{or})^T, (\hat{\boldsymbol{\beta}}^{or})^T)^T$ .

(ii). There is an event  $E_2$  such that  $P(E_2^C) \leq 2n^{-1}$ . On  $E_1 \cap E_2$ , there is a neighborhood of  $((\hat{\boldsymbol{\mu}}^{or})^T, (\hat{\boldsymbol{\beta}}^{or})^T)^T$ , denoted by  $\Theta_n$ , such that  $Q_n(\boldsymbol{\mu}, \boldsymbol{\beta}) \geq Q_n(\boldsymbol{\mu}^*, \boldsymbol{\beta})$  for any  $((\boldsymbol{\mu})^T, (\boldsymbol{\beta})^T)^T \in \Theta_n \cap \Theta$  for sufficiently large  $n$ .

Therefore, by the results in (i) and (ii), we have  $Q_n(\boldsymbol{\mu}, \boldsymbol{\beta}) > Q_n(\hat{\boldsymbol{\mu}}^{or}, \hat{\boldsymbol{\beta}}^{or})$  for any  $((\boldsymbol{\mu})^T, (\boldsymbol{\beta})^T)^T \in \Theta_n \cap \Theta$  and  $((\boldsymbol{\mu})^T, (\boldsymbol{\beta})^T)^T \neq ((\hat{\boldsymbol{\mu}}^{or})^T, (\hat{\boldsymbol{\beta}}^{or})^T)^T$ , so that  $((\hat{\boldsymbol{\mu}}^{or})^T, (\hat{\boldsymbol{\beta}}^{or})^T)^T$  is a strict local minimizer of  $Q_n(\boldsymbol{\mu}, \boldsymbol{\beta})$  given in (3) on the event  $E_1 \cap E_2$  with  $P(E_1 \cap E_2) \geq 1 - 2(K+p+1)n^{-1}$  for sufficiently large  $n$ .

In the following we prove the result in (i). We first show  $P_n^G(T^*(\boldsymbol{\mu})) = C_n$  for any  $\boldsymbol{\mu} \in \Theta$ , where  $C_n$  is a constant which does not depend on  $\boldsymbol{\mu}$ . Let  $T^*(\boldsymbol{\mu}) = \boldsymbol{\alpha} = (\alpha_1, \dots, \alpha_K)^T$ . It suffices to show that  $|\alpha_k - \alpha_{k'}| > a\lambda$  for all  $k$  and  $k'$ . Then by Condition (C2),  $\rho(|\alpha_k - \alpha_{k'}|)$  is a constant, and as a result  $P_n^G(T^*(\boldsymbol{\mu}))$  is a constant. Since

$$|\alpha_k - \alpha_{k'}| \geq |\alpha_k^0 - \alpha_{k'}^0| - 2\|\boldsymbol{\alpha} - \boldsymbol{\alpha}^0\|_{\infty},$$

and

$$\begin{aligned} \|\boldsymbol{\alpha} - \boldsymbol{\alpha}^0\|_{\infty} &= \sup_k \left| \sum_{i \in \mathcal{G}_k} \mu_i / |\mathcal{G}_k| - \alpha_k^0 \right| = \sup_k \left| \sum_{i \in \mathcal{G}_k} (\mu_i - \mu_i^0) / |\mathcal{G}_k| \right| \\ &\leq \sup_k \sup_{i \in \mathcal{G}_k} |\mu_i - \mu_i^0| = \|\boldsymbol{\mu} - \boldsymbol{\mu}^0\|_{\infty}, \end{aligned} \quad (\text{A.5})$$

then for all  $k$  and  $k'$

$$|\alpha_k - \alpha_{k'}| \geq |\alpha_k^0 - \alpha_{k'}^0| - 2\|\boldsymbol{\mu} - \boldsymbol{\mu}^0\|_{\infty} \geq b_n - 2\phi_n > a\lambda,$$

where the last inequality follows from the assumption that  $b_n > a\lambda \gg \phi_n$ . Therefore, we have  $P_n^G(T^*(\boldsymbol{\mu})) = C_n$ , and hence  $Q_n^G(T^*(\boldsymbol{\mu}), \boldsymbol{\beta}) = L_n^G(T^*(\boldsymbol{\mu}), \boldsymbol{\beta}) + C_n$  for all  $((\boldsymbol{\mu})^T, (\boldsymbol{\beta})^T)^T \in \Theta$ . Since  $((\hat{\boldsymbol{\alpha}}^{or})^T, (\hat{\boldsymbol{\beta}}^{or})^T)^T$  is the unique global minimizer of  $L_n^G(\boldsymbol{\alpha}, \boldsymbol{\beta})$ , then  $L_n^G(T^*(\boldsymbol{\mu}), \boldsymbol{\beta}) > L_n^G(\hat{\boldsymbol{\alpha}}^{or}, \hat{\boldsymbol{\beta}}^{or})$  for all  $((\boldsymbol{\mu})^T, (\boldsymbol{\beta})^T)^T \neq ((\hat{\boldsymbol{\alpha}}^{or})^T, (\hat{\boldsymbol{\beta}}^{or})^T)^T$  and thus  $Q_n^G(T^*(\boldsymbol{\mu}), \boldsymbol{\beta}) > Q_n^G(\hat{\boldsymbol{\alpha}}^{or}, \hat{\boldsymbol{\beta}}^{or})$  for all  $T^*(\boldsymbol{\mu}) \neq \hat{\boldsymbol{\alpha}}^{or}$ . By (A.4), we have  $Q_n^G(\hat{\boldsymbol{\alpha}}^{or}, \hat{\boldsymbol{\beta}}^{or}) = Q_n(\hat{\boldsymbol{\mu}}^{or}, \hat{\boldsymbol{\beta}}^{or})$  and  $Q_n^G(T^*(\boldsymbol{\mu}), \boldsymbol{\beta}) = Q_n(T^{-1}(T^*(\boldsymbol{\mu})), \boldsymbol{\beta}) = Q_n(\boldsymbol{\mu}^*, \boldsymbol{\beta})$ . Therefore,  $Q_n(\boldsymbol{\mu}^*, \boldsymbol{\beta}) > Q_n(\hat{\boldsymbol{\mu}}^{or}, \hat{\boldsymbol{\beta}}^{or})$  for all  $\boldsymbol{\mu}^* \neq \hat{\boldsymbol{\mu}}^{or}$ , and the result in (i) is proved.

Next we prove the result in (ii). For a positive sequence  $t_n$ , let  $\Theta_n = \{\boldsymbol{\mu} : \|\boldsymbol{\mu} - \hat{\boldsymbol{\mu}}^{or}\| \leq t_n\}$ . For  $((\boldsymbol{\mu})^T, (\boldsymbol{\beta})^T)^T \in \Theta_n \cap \Theta$ , by Taylor's expansion, we have

$$Q_n(\boldsymbol{\mu}, \boldsymbol{\beta}) - Q_n(\boldsymbol{\mu}^*, \boldsymbol{\beta}) = \Gamma_1 + \Gamma_2,$$

where

$$\begin{aligned}\Gamma_1 &= -(\mathbf{y} - (\mathbf{I}_n, \mathbf{X})((\boldsymbol{\mu}^m)^T, \boldsymbol{\beta}^T)^T)(\boldsymbol{\mu} - \boldsymbol{\mu}^*), \\ \Gamma_2 &= \sum_{i=1}^n \frac{\partial P_n(\boldsymbol{\mu}^m)}{\partial \mu_i} (\mu_i - \mu_i^*),\end{aligned}$$

in which  $\boldsymbol{\mu}^m = \varsigma \boldsymbol{\mu} + (1 - \varsigma) \boldsymbol{\mu}^*$  for some  $\varsigma \in (0, 1)$ . Moreover,

$$\begin{aligned}\Gamma_2 &= \lambda \sum_{\{j>i\}} \bar{\rho}(\mu_i^m - \mu_j^m)(\mu_i - \mu_i^*) + \lambda \sum_{\{j<i\}} \bar{\rho}(\mu_i^m - \mu_j^m)(\mu_i - \mu_i^*) \\ &= \lambda \sum_{\{j>i\}} \bar{\rho}(\mu_i^m - \mu_j^m)(\mu_i - \mu_i^*) + \lambda \sum_{\{i<j\}} \bar{\rho}(\mu_j^m - \mu_i^m)(\mu_j - \mu_j^*) \\ &= \lambda \sum_{\{j>i\}} \bar{\rho}(\mu_i^m - \mu_j^m)(\mu_i - \mu_i^*) - \lambda \sum_{\{i<j\}} \bar{\rho}(\mu_i^m - \mu_j^m)(\mu_j - \mu_j^*) \\ &= \lambda \sum_{\{j>i\}} \bar{\rho}(\mu_i^m - \mu_j^m) \{(\mu_i - \mu_i^*) - (\mu_j - \mu_j^*)\}.\end{aligned}\tag{A.6}$$

When  $i, j \in \mathcal{G}_k$ ,  $\mu_i^* = \mu_j^*$ , and  $\mu_i^m - \mu_j^m$  has the same sign as  $\mu_i - \mu_j$ . Hence

$$\begin{aligned}\Gamma_2 &= \lambda \sum_{k=1}^K \sum_{\{i,j \in \mathcal{G}_k, i<j\}} \rho'(|\mu_i^m - \mu_j^m|) |\mu_i - \mu_j| \\ &\quad + \lambda \sum_{k<k'} \sum_{\{i \in \mathcal{G}_k, j' \in \mathcal{G}_{k'}\}} \bar{\rho}(\mu_i^m - \mu_{j'}^m) \{(\mu_i - \mu_i^*) - (\mu_{j'} - \mu_{j'}^*)\}.\end{aligned}$$

As shown in (A.5),

$$\|\boldsymbol{\mu}^* - \boldsymbol{\mu}^0\|_\infty = \|\boldsymbol{\alpha} - \boldsymbol{\alpha}^0\|_\infty \leq \|\boldsymbol{\mu} - \boldsymbol{\mu}^0\|_\infty.$$

Since  $\boldsymbol{\mu}^m = \varsigma \boldsymbol{\mu} + (1 - \varsigma) \boldsymbol{\mu}^*$ ,

$$\|\boldsymbol{\mu}^m - \boldsymbol{\mu}^0\|_\infty \leq \|\boldsymbol{\mu} - \boldsymbol{\mu}^0\|_\infty \leq \phi_n,\tag{A.7}$$

and then for  $k \neq k'$ ,  $i \in \mathcal{G}_k$ ,  $j \in \mathcal{G}_{k'}$ ,

$$\begin{aligned}|\mu_i^m - \mu_j^m| &\geq \min_{i \in \mathcal{G}_k, j \in \mathcal{G}_{k'}} |\mu_i^0 - \mu_j^0| - 2\|\boldsymbol{\mu}^m - \boldsymbol{\mu}^0\|_\infty \\ &\geq b_n - 2\|\boldsymbol{\mu} - \boldsymbol{\mu}^0\|_\infty \geq b_n - 2\phi_n > a\lambda,\end{aligned}$$

and thus  $\bar{\rho}(\mu_i^m - \mu_j^m) = 0$ . Therefore,

$$\Gamma_2 = \lambda \sum_{k=1}^K \sum_{\{i,j \in \mathcal{G}_k, i<j\}} \rho'(|\mu_i^m - \mu_j^m|) |\mu_i - \mu_j|.$$

Furthermore, by the same reasoning as (A.5), we have

$$\|\boldsymbol{\mu}^* - \hat{\boldsymbol{\mu}}^{or}\|_\infty \leq \|\boldsymbol{\mu} - \hat{\boldsymbol{\mu}}^{or}\|_\infty.$$

Then

$$\begin{aligned}|\mu_i^m - \mu_j^m| &\leq 2\|\boldsymbol{\mu}^m - \boldsymbol{\mu}^*\|_\infty \leq 2\|\boldsymbol{\mu} - \boldsymbol{\mu}^*\|_\infty \\ &\leq 2(\|\boldsymbol{\mu} - \hat{\boldsymbol{\mu}}^{or}\|_\infty + \|\boldsymbol{\mu}^* - \hat{\boldsymbol{\mu}}^{or}\|_\infty) \\ &\leq 4\|\boldsymbol{\mu} - \hat{\boldsymbol{\mu}}^{or}\|_\infty \leq 4t_n.\end{aligned}$$

Hence  $\rho'(|\mu_i^m - \mu_j^m|) \geq \rho'(4t_n)$  by concavity of  $\rho(\cdot)$ . As a result,

$$\Gamma_2 \geq \lambda \sum_{k=1}^K \sum_{\{i,j \in \mathcal{G}_k, i < j\}} \rho'(4t_n) |\mu_i - \mu_j|. \quad (\text{A.8})$$

Let

$$\mathbf{w} = (w_1, \dots, w_n)^T = \mathbf{y} - (\mathbf{I}_n, \mathbf{X})((\boldsymbol{\mu}^m)^T, \boldsymbol{\beta}^T)^T.$$

Then

$$\begin{aligned} \Gamma_1 &= -\mathbf{w}^T(\boldsymbol{\mu} - \boldsymbol{\mu}^*) = -\sum_{k=1}^K \sum_{\{i,j \in \mathcal{G}_k\}} \frac{w_i(\mu_i - \mu_j)}{|\mathcal{G}_k|} \\ &= -\sum_{k=1}^K \sum_{\{i,j \in \mathcal{G}_k\}} \frac{w_i(\mu_i - \mu_j)}{2|\mathcal{G}_k|} - \sum_{k=1}^K \sum_{\{i,j \in \mathcal{G}_k\}} \frac{w_i(\mu_i - \mu_j)}{2|\mathcal{G}_k|} \\ &= -\sum_{k=1}^K \sum_{\{i,j \in \mathcal{G}_k\}} \frac{(w_j - w_i)(\mu_j - \mu_i)}{2|\mathcal{G}_k|} \\ &= -\sum_{k=1}^K \sum_{\{i,j \in \mathcal{G}_k, i < j\}} \frac{(w_j - w_i)(\mu_j - \mu_i)}{|\mathcal{G}_k|}. \end{aligned} \quad (\text{A.9})$$

Since

$$\mathbf{w} = \boldsymbol{\epsilon} + \mathbf{X}(\boldsymbol{\beta}^0 - \boldsymbol{\beta}) + \boldsymbol{\mu}^0 - \boldsymbol{\mu}^m,$$

then

$$\max_{i,j} |w_j - w_i| \leq 2\|\mathbf{w}\|_\infty \leq 2\|\boldsymbol{\epsilon}\|_\infty + 2\|\mathbf{X}\|_\infty \|\boldsymbol{\beta}^0 - \boldsymbol{\beta}\|_\infty + 2\|\boldsymbol{\mu}^0 - \boldsymbol{\mu}^m\|_\infty.$$

Hence by (A.7) and Condition (C1),

$$\max_{i,j} |w_j - w_i| \leq 2\|\boldsymbol{\epsilon}\|_\infty + 2C_2 p \phi_n + 2\phi_n.$$

By Condition (C3),

$$P(\|\boldsymbol{\epsilon}\|_\infty > \sqrt{2c_1^{-1}} \sqrt{\log n}) \leq \sum_{i=1}^n P(|\varepsilon_i| > \sqrt{2c_1^{-1}} \sqrt{\log n}) \leq 2n^{-1}.$$

Thus there is an event  $E_2$  such that  $P(E_2^C) \leq 2n^{-1}$ , and on the event  $E_2$ ,

$$\max_{i,j} |w_j - w_i| \leq 2\sqrt{2c_1^{-1}} \sqrt{\log n} + 2(C_2 p + 1)\phi_n. \quad (\text{A.10})$$

Hence

$$|\mathcal{G}_{\min}|^{-1} \max_{i,j} |w_j - w_i| \leq |\mathcal{G}_{\min}|^{-1} \{2\sqrt{2c_1^{-1}} \sqrt{\log n} + 2(C_2 p + 1)\phi_n\}.$$

Since  $|\mathcal{G}_{\min}| \gg \sqrt{(K+p)n \log n}$  and  $p = o(n)$ , then  $|\mathcal{G}_{\min}|^{-1} p = o(1)$ . Thus  $\lambda \gg \phi_n \gg |\mathcal{G}_{\min}|^{-1} 2(C_2 p + 1)\phi_n$ . Moreover,  $\lambda \gg \phi_n \gg |\mathcal{G}_{\min}|^{-1} \sqrt{\log n}$ . Hence

$$\lambda \gg |\mathcal{G}_{\min}|^{-1} \max_{i,j} |w_j - w_i|. \quad (\text{A.11})$$

Let  $t_n = o(1)$ , then  $\rho'(4t_n) \rightarrow 1$ . Therefore, by (A.8), (A.9), and (A.11),

$$\begin{aligned} Q_n(\boldsymbol{\mu}, \boldsymbol{\beta}) - Q_n(\boldsymbol{\mu}^*, \boldsymbol{\beta}) &= \Gamma_1 + \Gamma_2 \\ &\geq \sum_{k=1}^K \sum_{\{i,j \in \mathcal{G}_k, i < j\}} [\lambda \rho'(4t_n) - |\mathcal{G}_{\min}|^{-1} \max_{i,j} |w_j - w_i|] |\mu_i - \mu_j| \geq 0, \end{aligned}$$

for sufficiently large  $n$ , so that the result in (ii) is proved.

## A.4 Proof of Theorem 3

In this section we show the results in Theorem 3. The proofs of (12) and (13) follow the same arguments as the proof of Theorem 1 by letting  $\mathbf{Z} = \mathbf{1}_n$  and  $|\mathcal{G}_{\min}| = n$ , and thus they are omitted. Next, we will show (14). It follows similar procedures as the proof of Theorem 2 with the details given below. Let  $\mathcal{M}$  be the subspace of  $R^n$ , defined as

$$\mathcal{M} = \{\boldsymbol{\mu} \in R^n : \mu_1 = \cdots = \mu_n\}.$$

For each  $\boldsymbol{\mu} \in \mathcal{M}$ , it can be written as  $\boldsymbol{\mu} = \mathbf{1}_n \alpha$ , where  $\alpha$  is the common value of  $\boldsymbol{\mu}$ . Let  $T : \mathcal{M} \rightarrow R$  be the mapping such that  $T(\boldsymbol{\mu})$  is the scalar that equals to the common value of  $\mu_i$ 's. Let  $T^* : R^n \rightarrow R$  be the mapping such that  $T^*(\boldsymbol{\mu}) = n^{-1} \sum_{i=1}^n \mu_i$ . Clearly, when  $\boldsymbol{\mu} \in \mathcal{M}$ ,  $T(\boldsymbol{\mu}) = T^*(\boldsymbol{\mu})$ . Consider the neighborhood of  $(\boldsymbol{\mu}^0, \boldsymbol{\beta}^0)$ :

$$\Theta = \{\boldsymbol{\mu} \in R^n, \boldsymbol{\beta} \in R^p : \|((\boldsymbol{\mu} - \boldsymbol{\mu}^0)^T, (\boldsymbol{\beta} - \boldsymbol{\beta}^0)^T)^T\|_\infty \leq \phi_n\},$$

where  $\phi_n = c_1^{-1/2} C_1^{-1} \sqrt{1+p} \sqrt{n^{-1} \log n}$ . By the result in (12), there is an event  $E_1$  such that on the even  $E_1$ ,

$$\|((\hat{\boldsymbol{\mu}}^{or} - \boldsymbol{\mu}^0)^T, (\hat{\boldsymbol{\beta}}^{or} - \boldsymbol{\beta}^0)^T)^T\|_\infty \leq \phi_n,$$

and  $P(E_1^C) \leq 2(1+p)n^{-1}$ . Hence  $((\hat{\boldsymbol{\mu}}^{or})^T, (\hat{\boldsymbol{\beta}}^{or})^T)^T \in \Theta$  on the event  $E_1$ . For any  $\boldsymbol{\mu} \in R^n$ , let  $\boldsymbol{\mu}^* = T^{-1}(T^*(\boldsymbol{\mu}))$ . We show that  $(\hat{\boldsymbol{\mu}}^{or}, \hat{\boldsymbol{\beta}}^{or})$  is a strictly local minimizer of the objective function (3) with probability approaching 1 through the following two steps.

(i). On the event  $E_1$ ,  $Q_n(\boldsymbol{\mu}^*, \boldsymbol{\beta}) > Q_n(\hat{\boldsymbol{\mu}}^{or}, \hat{\boldsymbol{\beta}}^{or})$  for any  $(\boldsymbol{\mu}^T, \boldsymbol{\beta}^T)^T \in \Theta$  and  $((\boldsymbol{\mu}^*)^T, \boldsymbol{\beta}^T)^T \neq ((\hat{\boldsymbol{\mu}}^{or})^T, (\hat{\boldsymbol{\beta}}^{or})^T)^T$ .

(ii). There is an event  $E_2$  such that  $P(E_2^C) \leq 2n^{-1}$ . On  $E_1 \cap E_2$ , there is a neighborhood of  $((\hat{\boldsymbol{\mu}}^{or})^T, (\hat{\boldsymbol{\beta}}^{or})^T)^T$ , denoted by  $\Theta_n$ , such that  $Q_n(\boldsymbol{\mu}, \boldsymbol{\beta}) \geq Q_n(\boldsymbol{\mu}^*, \boldsymbol{\beta})$  for any  $(\boldsymbol{\mu}^T, \boldsymbol{\beta}^T)^T \in \Theta_n \cap \Theta$  for sufficiently large  $n$ .

Therefore, by the results in (i) and (ii), we have  $Q_n(\boldsymbol{\mu}, \boldsymbol{\beta}) > Q_n(\hat{\boldsymbol{\mu}}^{or}, \hat{\boldsymbol{\beta}}^{or})$  for any  $(\boldsymbol{\mu}^T, \boldsymbol{\beta}^T)^T \in \Theta_n \cap \Theta$  and  $(\boldsymbol{\mu}^T, \boldsymbol{\beta}^T)^T \neq ((\hat{\boldsymbol{\mu}}^{or})^T, (\hat{\boldsymbol{\beta}}^{or})^T)^T$ , so that  $((\hat{\boldsymbol{\mu}}^{or})^T, (\hat{\boldsymbol{\beta}}^{or})^T)^T$  is a strict local minimizer of  $Q_n(\boldsymbol{\mu}, \boldsymbol{\beta})$  on the event  $E_1 \cap E_2$  with  $P(E_1 \cap E_2) \geq 1 - 2(p+2)n^{-1}$  for sufficiently large  $n$ .

By the definition of  $((\hat{\boldsymbol{\mu}}^{or})^T, (\hat{\boldsymbol{\beta}}^{or})^T)^T$ , we have  $\frac{1}{2} \sum_{i=1}^n (y_i - \boldsymbol{\mu}^* - \mathbf{x}_i^T \boldsymbol{\beta})^2 > \frac{1}{2} \sum_{i=1}^n (y_i - \hat{\boldsymbol{\mu}}^{or} - \mathbf{x}_i^T \hat{\boldsymbol{\beta}}^{or})^2$  for any  $(\boldsymbol{\mu}^T, \boldsymbol{\beta}^T)^T \in \Theta$  and  $((\boldsymbol{\mu}^*)^T, \boldsymbol{\beta}^T)^T \neq ((\hat{\boldsymbol{\mu}}^{or})^T, (\hat{\boldsymbol{\beta}}^{or})^T)^T$ . Moreover, since



$p_\gamma(|\hat{\mu}_i^{or} - \hat{\mu}_j^{or}|, \lambda) = p_\gamma(|\mu_i^* - \mu_j^*|, \lambda) = 0$  for  $1 \leq i, j \leq n$ , we have  $Q_n(\boldsymbol{\mu}^*, \boldsymbol{\beta}) = \frac{1}{2} \sum_{i=1}^n (y_i - \boldsymbol{\mu}^* - \mathbf{x}_i^T \boldsymbol{\beta})^2$  and  $Q_n(\hat{\boldsymbol{\mu}}^{or}, \hat{\boldsymbol{\beta}}^{or}) = \frac{1}{2} \sum_{i=1}^n (y_i - \hat{\boldsymbol{\mu}}^{or} - \mathbf{x}_i^T \hat{\boldsymbol{\beta}}^{or})^2$ . Therefore,  $Q_n(\boldsymbol{\mu}^*, \boldsymbol{\beta}) > Q_n(\hat{\boldsymbol{\mu}}^{or}, \hat{\boldsymbol{\beta}}^{or})$ .

Next we prove the result in (ii). For a positive sequence  $t_n$ , let  $\Theta_n = \{\boldsymbol{\mu} : \|\boldsymbol{\mu} - \hat{\boldsymbol{\mu}}^{or}\| \leq t_n\}$ . For  $(\boldsymbol{\mu}^T, \boldsymbol{\beta}^T)^T \in \Theta_n \cap \Theta$ , by Taylor's expansion, we have

$$Q_n(\boldsymbol{\mu}, \boldsymbol{\beta}) - Q_n(\boldsymbol{\mu}^*, \boldsymbol{\beta}) = \Gamma_1 + \Gamma_2,$$

where

$$\begin{aligned} \Gamma_1 &= -(\mathbf{y} - (\mathbf{I}_n, \mathbf{X})((\boldsymbol{\mu}^m)^T, \boldsymbol{\beta}^T)^T)(\boldsymbol{\mu} - \boldsymbol{\mu}^*), \\ \Gamma_2 &= \sum_{i=1}^n \frac{\partial P_n(\boldsymbol{\mu}^m)}{\partial \mu_i} (\mu_i - \mu_i^*). \end{aligned}$$

in which  $\boldsymbol{\mu}^m = \varsigma \boldsymbol{\mu} + (1 - \varsigma) \boldsymbol{\mu}^*$  for some  $\varsigma \in (0, 1)$ . Moreover, by (A.6), we have

$$\begin{aligned} \Gamma_2 &= \lambda \sum_{i < j} \bar{\rho}(\mu_i^m - \mu_j^m) \{(\mu_i - \mu_i^*) - (\mu_j - \mu_j^*)\} \\ &= \lambda \sum_{i < j} \rho'(|\mu_i^m - \mu_j^m|) |\mu_i - \mu_j|, \end{aligned}$$

where the second equality holds due to the fact that  $\mu_i^* = \mu_j^*$  and  $\mu_i^m - \mu_j^m$  has the same sign as  $\mu_i - \mu_j$ . Let  $T^*(\boldsymbol{\mu}) = \alpha$ . Following the same reasoning as the proof for (A.5), we have

$$\|\boldsymbol{\mu}^* - \hat{\boldsymbol{\mu}}^{or}\|_\infty = |\alpha - \hat{\alpha}^{or}| \leq \|\boldsymbol{\mu} - \hat{\boldsymbol{\mu}}^{or}\|_\infty.$$

Then

$$\begin{aligned} |\mu_i^m - \mu_j^m| &\leq 2\|\boldsymbol{\mu}^m - \boldsymbol{\mu}^*\|_\infty \leq 2\|\boldsymbol{\mu} - \boldsymbol{\mu}^*\|_\infty \\ &\leq 2(\|\boldsymbol{\mu} - \hat{\boldsymbol{\mu}}^{or}\|_\infty + \|\boldsymbol{\mu}^* - \hat{\boldsymbol{\mu}}^{or}\|_\infty) \\ &\leq 4\|\boldsymbol{\mu} - \hat{\boldsymbol{\mu}}^{or}\|_\infty \leq 4t_n. \end{aligned}$$

Hence  $\rho'(|\mu_i^m - \mu_j^m|) \geq \rho'(4t_n)$  by concavity of  $\rho(\cdot)$ . As a result,

$$\Gamma_2 \geq \lambda \sum_{i < j} \rho'(4t_n) |\mu_i - \mu_j|. \quad (\text{A.12})$$

Then, by the same reasoning as the proof for (A.9), we have

$$\Gamma_1 = -\mathbf{w}^T(\boldsymbol{\mu} - \boldsymbol{\mu}^*) = -n^{-1} \sum_{i < j} (w_j - w_i)(\mu_j - \mu_i), \quad (\text{A.13})$$

where  $\mathbf{w} = (w_1, \dots, w_n)^T = \mathbf{y} - (\mathbf{I}_n, \mathbf{X})((\boldsymbol{\mu}^m)^T, \boldsymbol{\beta}^T)^T$ . By the same reasoning as the proof for (A.10), we have that there is an event  $E_2$  such that  $P(E_2^C) \leq 2n^{-1}$ , and on the event  $E_2$ ,

$$\max_{i,j} |w_j - w_i| \leq 2\sqrt{2c_1^{-1}}\sqrt{\log n} + 2(C_2p + 1)\phi_n.$$

Hence

$$n^{-1} \max_{i,j} |w_j - w_i| \leq n^{-1} \{2\sqrt{2c_1^{-1}}\sqrt{\log n} + 2(C_2p + 1)\phi_n\}.$$

Since  $n^{-1}p = o(1)$ , then  $\lambda \gg \phi_n \gg n^{-1}2(C_2p + 1)\phi_n$ . Moreover,  $\lambda \gg \phi_n \gg n^{-1}\sqrt{\log n}$ .

Hence

$$\lambda \gg n^{-1} \max_{i,j} |w_j - w_i|. \quad (\text{A.14})$$

Let  $t_n = o(1)$ , then  $\rho'(4t_n) \rightarrow 1$ . Therefore, by (A.12), (A.13), and (A.14),

$$\begin{aligned} Q_n(\boldsymbol{\mu}, \boldsymbol{\beta}) - Q_n(\boldsymbol{\mu}^*, \boldsymbol{\beta}) &= \Gamma_1 + \Gamma_2 \\ &\geq \sum_{i < j} [\lambda \rho'(4t_n) - n^{-1} \max_{i,j} |w_j - w_i|] |\mu_i - \mu_j| \geq 0, \end{aligned}$$

for sufficiently large  $n$ , so that the result in (ii) is proved.

## A.5 Estimation procedure for model (2)

We let  $\tilde{\mathbf{x}}_i = (1, \mathbf{x}_i^T)^T$  and  $\boldsymbol{\beta}^* = (\boldsymbol{\mu}, \boldsymbol{\beta}^T)^T$ . The model (2) can be written as  $y_i = \mathbf{z}_i^T \boldsymbol{\theta}_i + \tilde{\mathbf{x}}_i^T \boldsymbol{\beta}^* + \epsilon_i, i = 1, \dots, n$ . Similar to the assumption for model (1), we assume that observations can be divided into  $K$  different subgroups with  $K < n$ . Let  $\mathcal{G} = (\mathcal{G}_1, \dots, \mathcal{G}_K)$  be a partition of  $\{1, \dots, n\}$ , and we assume  $\boldsymbol{\theta}_i = \boldsymbol{\alpha}_k$  for all  $i \in \mathcal{G}_k$ , where  $\boldsymbol{\alpha}_k$  is the common value for the  $\boldsymbol{\theta}_i$ 's from group  $\mathcal{G}_k$ . Then the estimates of  $\boldsymbol{\theta} = (\boldsymbol{\theta}_1^T, \dots, \boldsymbol{\theta}_n^T)^T$  and  $\boldsymbol{\beta}^*$  can be obtained by minimizing

$$Q_n(\boldsymbol{\theta}, \boldsymbol{\beta}^*; \lambda) = \frac{1}{2} \sum_{i=1}^n (y_i - \mathbf{z}_i^T \boldsymbol{\theta}_i - \tilde{\mathbf{x}}_i^T \boldsymbol{\beta}^*)^2 + \sum_{1 \leq i < j \leq n} p(\|\boldsymbol{\theta}_i - \boldsymbol{\theta}_j\|, \lambda), \quad (\text{A.15})$$

where  $p(\cdot, \lambda)$  is a concave penalty function with a tuning parameter  $\lambda$ , such as MCP or SCAD as described in Section 2. Then for a given  $\lambda > 0$ , define

$$(\hat{\boldsymbol{\theta}}(\lambda), \hat{\boldsymbol{\beta}}^*(\lambda)) = \operatorname{argmin} Q_n(\boldsymbol{\theta}, \boldsymbol{\beta}^*; \lambda).$$

The penalty shrinks some of  $\|\boldsymbol{\theta}_i - \boldsymbol{\theta}_j\|$  to zero. Based on this, we can partition the treatment effects into subgroups. Specifically, let  $\hat{\lambda}$  be the value of the tuning parameter selected based on a data-driven procedure such as the BIC. For simplicity, write  $(\hat{\boldsymbol{\theta}}, \hat{\boldsymbol{\beta}}^*) \equiv (\hat{\boldsymbol{\theta}}(\lambda), \hat{\boldsymbol{\beta}}^*(\lambda))$ . Let  $\{\hat{\boldsymbol{\alpha}}_1, \dots, \hat{\boldsymbol{\alpha}}_{\hat{K}}\}$  be the distinct values of  $\hat{\boldsymbol{\theta}}$ . Let  $\hat{\mathcal{G}}_k = \{i : \hat{\boldsymbol{\theta}}_i = \hat{\boldsymbol{\alpha}}_k, 1 \leq i \leq n\}, 1 \leq k \leq \hat{K}$ . Then  $\{\hat{\mathcal{G}}_1, \dots, \hat{\mathcal{G}}_{\hat{K}}\}$  constitutes a partition of  $\{1, \dots, n\}$ . Then we apply our proposed ADMM algorithm to obtain the estimates of  $\boldsymbol{\theta}$  and  $\boldsymbol{\beta}^*$  described as follows.

We reparametrize by introducing a new set of parameters  $\boldsymbol{\delta}_{ij} = \boldsymbol{\theta}_i - \boldsymbol{\theta}_j$ , and hence minimization of (A.15) is equivalent to the constraint optimization problem:

$$S(\boldsymbol{\theta}, \boldsymbol{\beta}^*, \boldsymbol{\delta}) = \frac{1}{2} \sum_{i=1}^n (y_i - \mathbf{z}_i^T \boldsymbol{\theta}_i - \tilde{\mathbf{x}}_i^T \boldsymbol{\beta}^*)^2 + \sum_{i < j} p_\gamma(\|\boldsymbol{\delta}_{ij}\|, \lambda),$$

subject to  $\boldsymbol{\theta}_i - \boldsymbol{\theta}_j - \boldsymbol{\delta}_{ij} = \mathbf{0}$ ,

where  $\boldsymbol{\delta} = \{\boldsymbol{\delta}_{ij}^T, i < j\}^T$ . By the augmented Lagrangian method (ALM), the estimates of the parameters can be obtained by minimizing

$$L(\boldsymbol{\theta}, \boldsymbol{\beta}^*, \boldsymbol{\delta}, \mathbf{v}) = S(\boldsymbol{\theta}, \boldsymbol{\beta}^*, \boldsymbol{\delta}) + \sum_{i < j} \langle \mathbf{v}_{ij}, \boldsymbol{\theta}_i - \boldsymbol{\theta}_j - \boldsymbol{\delta}_{ij} \rangle + \frac{\vartheta}{2} \sum_{i < j} \|\boldsymbol{\theta}_i - \boldsymbol{\theta}_j - \boldsymbol{\delta}_{ij}\|^2,$$

where the dual variables  $\mathbf{v} = \{\mathbf{v}_{ij}^T, i < j\}^T$  are Lagrange multipliers and  $\vartheta$  is the penalty parameter. We then can obtain the estimators of  $(\boldsymbol{\theta}, \boldsymbol{\beta}^*, \boldsymbol{\delta}, \mathbf{v})$  through iterations by the ADMM.

For given  $(\boldsymbol{\theta}, \boldsymbol{\beta}^*, \mathbf{v})$ , the minimizer of  $L(\boldsymbol{\theta}, \boldsymbol{\beta}^*, \boldsymbol{\delta}, \mathbf{v})$  with respect to  $\boldsymbol{\delta}_{ij}$  is unique and has a closed-form expression for the L<sub>1</sub>, MCP and SCAD penalties, respectively. Specifically, for given  $(\boldsymbol{\theta}, \boldsymbol{\beta}^*, \mathbf{v})$ , the minimization problem is the same as minimizing

$$\frac{\vartheta}{2} \sum_{i < j} \|\boldsymbol{\zeta}_{ij} - \boldsymbol{\delta}_{ij}\|^2 + \sum_{i < j} p_\gamma(\|\boldsymbol{\delta}_{ij}\|, \lambda)$$

with respect to  $\boldsymbol{\delta}_{ij}$ , where  $\boldsymbol{\zeta}_{ij} = \boldsymbol{\theta}_i - \boldsymbol{\theta}_j + \vartheta^{-1} \mathbf{v}_{ij}$ . Hence, the closed-form solution for the L<sub>1</sub> penalty is

$$\hat{\boldsymbol{\delta}}_{ij} = S(\boldsymbol{\zeta}_{ij}, \lambda/\vartheta), \tag{A.16}$$

where  $S(\mathbf{z}, t) = (1 - t/\|\mathbf{z}\|)_+ \mathbf{z}$  is the groupwise soft thresholding rule, and  $(x)_+ = x$  if  $x > 0$  and 0, otherwise. For the MCP penalty with  $\gamma > 1/\vartheta$ , it is

$$\hat{\boldsymbol{\delta}}_{ij} = \begin{cases} \frac{S(\boldsymbol{\zeta}_{ij}, \lambda/\vartheta)}{1 - 1/(\gamma\vartheta)} & \text{if } \|\boldsymbol{\zeta}_{ij}\| \leq \gamma\lambda \\ \boldsymbol{\zeta}_{ij} & \text{if } \|\boldsymbol{\zeta}_{ij}\| > \gamma\lambda. \end{cases} \tag{A.17}$$

For the SCAD penalty with  $\gamma > 1/\vartheta + 1$ , it is

$$\hat{\boldsymbol{\delta}}_{ij} = \begin{cases} \text{ST}(\boldsymbol{\zeta}_{ij}, \lambda/\vartheta) & \text{if } \|\boldsymbol{\zeta}_{ij}\| \leq \lambda + \lambda/\vartheta \\ \frac{\text{ST}(\boldsymbol{\zeta}_{ij}, \gamma\lambda/((\gamma-1)\vartheta))}{\boldsymbol{\zeta}_{ij}} & \text{if } \lambda + \lambda/\vartheta < \|\boldsymbol{\zeta}_{ij}\| \leq \gamma\lambda \\ \boldsymbol{\zeta}_{ij} & \text{if } \|\boldsymbol{\zeta}_{ij}\| > \gamma\lambda. \end{cases} \quad (\text{A.18})$$

**ADMM algorithm for (A.15).** We now describe the computational algorithm based on the ADMM for minimizing (A.15). It consists of iteratively updating  $\boldsymbol{\theta}, \boldsymbol{\beta}^*, \boldsymbol{\delta}$  and  $\mathbf{v}$ . The main ingredients of the algorithm are as follows.

First, for a given  $(\boldsymbol{\delta}, \mathbf{v})$ , to obtain an update of  $\boldsymbol{\theta}$  and  $\boldsymbol{\beta}^*$ , we set the derivatives  $\partial L(\boldsymbol{\theta}, \boldsymbol{\beta}^*, \boldsymbol{\delta}, \mathbf{v})/\partial \boldsymbol{\theta}$  and  $\partial L(\boldsymbol{\theta}, \boldsymbol{\beta}^*, \boldsymbol{\delta}, \mathbf{v})/\partial \boldsymbol{\beta}^*$  to zero, where

$$\begin{aligned} L(\boldsymbol{\theta}, \boldsymbol{\beta}^*, \boldsymbol{\delta}, \mathbf{v}) &= \frac{1}{2} \sum_{i=1}^n (y_i - \mathbf{z}_i^T \boldsymbol{\theta}_i - \tilde{\mathbf{x}}_i^T \boldsymbol{\beta}^*)^2 + \frac{\vartheta}{2} \sum_{i < j} \|\boldsymbol{\theta}_i - \boldsymbol{\theta}_j - \boldsymbol{\delta}_{ij} + \vartheta^{-1} \mathbf{v}_{ij}\|^2 + C \\ &= \frac{1}{2} \|\mathbf{Z}\boldsymbol{\theta} + \tilde{\mathbf{X}}\boldsymbol{\beta}^* - \mathbf{y}\|^2 + \frac{\vartheta}{2} \|\mathbf{A}\boldsymbol{\beta} - \boldsymbol{\delta} + \vartheta^{-1} \mathbf{v}\|^2 + C. \end{aligned}$$

Here  $C$  is a constant independent of  $\boldsymbol{\theta}$  and  $\boldsymbol{\beta}^*$ ,  $\mathbf{y} = (y_1, \dots, y_n)^T$ ,  $\mathbf{Z} = \text{diag}(\mathbf{z}_1^T, \dots, \mathbf{z}_n^T)$  and  $\tilde{\mathbf{X}} = (\tilde{\mathbf{x}}_1, \dots, \tilde{\mathbf{x}}_n)^T$ . Moreover,  $e_i$  is the  $n \times 1$  vector whose  $i^{\text{th}}$  element is 1 and the remaining ones are 0,  $\Delta = \{(e_i - e_j), i < j\}^T$  and  $\mathbf{A} = \Delta \otimes \mathbf{I}_p$ , where  $\mathbf{I}_d$  denotes the  $d \times d$  identity matrix and  $\otimes$  denotes the Kronecker product.

Thus for given  $\boldsymbol{\delta}^{(m)}$  and  $\mathbf{v}^{(m)}$  at the  $m^{\text{th}}$  step, the updates  $\boldsymbol{\theta}^{(m+1)}$  and  $\boldsymbol{\beta}^{*(m+1)}$ , which are the minimizers of  $L(\boldsymbol{\theta}, \boldsymbol{\beta}^*, \boldsymbol{\delta}^{(m)}, \mathbf{v}^{(m)})$ , are

$$\begin{aligned} \boldsymbol{\theta}^{(m+1)} &= (\mathbf{Z}^T(\mathbf{I}_n - \mathbf{Q}_{\tilde{\mathbf{X}}})\mathbf{Z} + \vartheta \mathbf{A}^T \mathbf{A})^{-1} [\mathbf{Z}^T(\mathbf{I}_n - \mathbf{Q}_{\tilde{\mathbf{X}}})\mathbf{y} + \vartheta \mathbf{A}^T(\boldsymbol{\delta}^{(m)} - \vartheta^{-1} \mathbf{v}^{(m)})], \\ \boldsymbol{\beta}^{*(m+1)} &= (\tilde{\mathbf{X}}^T \tilde{\mathbf{X}})^{-1} \tilde{\mathbf{X}}^T (\mathbf{y} - \mathbf{Z}\boldsymbol{\theta}^{(m+1)}), \end{aligned}$$

where  $\mathbf{Q}_{\tilde{\mathbf{X}}} = \tilde{\mathbf{X}}(\tilde{\mathbf{X}}^T \tilde{\mathbf{X}})^{-1} \tilde{\mathbf{X}}^T$ .

Second, the update of  $\boldsymbol{\delta}_{ij}$  at the  $(m+1)^{\text{th}}$  iteration is obtained by the formula given in (A.16), (A.17) and (A.18), respectively, by the Lasso, MCP and SCAD penalties with  $\boldsymbol{\zeta}_{ij}$  replaced by  $\boldsymbol{\zeta}_{ij}^{(m+1)} = \boldsymbol{\beta}_i^{(m+1)} - \boldsymbol{\beta}_j^{(m+1)} + \vartheta^{-1} \mathbf{v}_{ij}^{(m+1)}$ .

Finally, the estimate of  $\mathbf{v}_{ij}$  is updated as

$$\mathbf{v}_{ij}^{(m+1)} = \mathbf{v}_{ij}^{(m)} + \vartheta(\boldsymbol{\beta}_i^{(m+1)} - \boldsymbol{\beta}_j^{(m+1)} - \boldsymbol{\delta}_{ij}^{(m+1)}).$$

We iteratively update the estimates of  $\boldsymbol{\theta}, \boldsymbol{\beta}^*, \boldsymbol{\delta}$  and  $\boldsymbol{v}$  until the stopping rule is met. We track the progress of the ADMM based on the primal residual  $\mathbf{r}^{(m+1)} = \mathbf{A}\boldsymbol{\theta}^{(m+1)} - \boldsymbol{\delta}^{(m+1)}$ . We stop the algorithm when  $\mathbf{r}^{(m+1)}$  is close to zero such that  $\|\mathbf{r}^{(m+1)}\| < \epsilon$  for some small value  $\epsilon$ .

## References

Tseng, P. (2001). Convergence of a block coordinate descent method for nondifferentiable minimization, *Journal of Optimization Theory and Applications*, 109, 475-494.
